# Supplementary material for: Sitagliptin Induces Tolerogenic Human Dendritic Cells
Source: MDPI journal article supplement (doi:10.3390/ijms242316829), 2023-11-27
Supplement: s1 [file s1]

## Supplementary Tables and Figures

**Supplementary Table S1.** Dose-dependent effects of sitagliptin on selected parameters of the phenotype and functions of MoDCs (preliminary data)

| Parameters           | Sitagliptin (sita 0d protocol) ( $\mu\text{g/mL}$ ) |                   |                    |                   |
|----------------------|-----------------------------------------------------|-------------------|--------------------|-------------------|
|                      | 0                                                   | 100               | 250                | 500               |
| CD14 (%)             | 5.4 $\pm$ 1.1                                       | 6.2 $\pm$ 1.2     | 30.1 $\pm$ 4.8**   | 34.2 $\pm$ 3.3**  |
| CD83 (%)             | 64.2 $\pm$ 5.0                                      | 60.1 $\pm$ 6.2    | 28.3 $\pm$ 4.0**   | 35.2 $\pm$ 3.8**  |
| CD86 (MFI)           | 24126 $\pm$ 2300                                    | 19499 $\pm$ 3342* | 12160 $\pm$ 2400** | 5143 $\pm$ 675*** |
| ILT4 (%)             | 26.1 $\pm$ 3.1                                      | 28.2 $\pm$ 3.6    | 39.6 $\pm$ 6.4*    | 70.4 $\pm$ 5.8*** |
| IDO1 (%)             | 37.8 $\pm$ 4.0                                      | 47.1 $\pm$ 3.6*   | 46.6 $\pm$ 4.8*    | 65.6 $\pm$ 5.5**  |
| CD26 (%)             | 26.2 $\pm$ 3.0                                      | NT                | 53.3 $\pm$ 4.2**   | 49.2 $\pm$ 2.8**  |
| IL-12p70 (pg/mL)     | 2122 $\pm$ 220                                      | 1726 $\pm$ 152*   | 1890 $\pm$ 206     | 1245 $\pm$ 148**  |
| IL-23 (pg/mL)        | 1976 $\pm$ 208                                      | 1864 $\pm$ 214    | 1564 $\pm$ 126*    | 886 $\pm$ 125**   |
| IL-27 (pg/mL)        | 2806 $\pm$ 293                                      | 2950 $\pm$ 322    | 2726 $\pm$ 322     | 2140 $\pm$ 205*   |
| IL-1 $\beta$ (pg/mL) | 32.2 $\pm$ 4.0                                      | 36.6 $\pm$ 3.9    | 29.1 $\pm$ 4.0     | 18.4 $\pm$ 2.2**  |
| IL-10 (pg/mL)        | 712 $\pm$ 84                                        | 684 $\pm$ 72      | 956 $\pm$ 88*      | 802 $\pm$ 99      |
| TGF- $\beta$ (pg/mL) | 204 $\pm$ 31                                        | 288 $\pm$ 35**    | 272 $\pm$ 30**     | 310 $\pm$ 36**    |
| Proliferation (%)    | 56.2 $\pm$ 4.6                                      | 48.1 $\pm$ 3.8*   | 41.4 $\pm$ 5.0**   | 32.6 $\pm$ 4.0 ** |

The experiment was performed with mature MoDCs, except for the expression of CD14 on immature MoDCs. Values are presented as mean  $\pm$  SD (triplicates) of one experiment. \*  $p < 0.05$ ; \*\*  $p < 0.01$ ; \*\*\*  $p < 0.005$  compared to control cultures without sitagliptin. NT – Non-tested; The results obtained with 500  $\mu\text{g/mL}$  of sitagliptin were not included in the final experiments.

**Supplementary Table S2.** Viability of MoDCs in control and sitagliptin-treated cultures

| imMoDCs          | Trypan blue + cells (%) | Total viability (%) |
|------------------|-------------------------|---------------------|
| Control          | 4.1 $\pm$ 2.2           | 81.6 $\pm$ 4.2      |
| Sita 0d protocol | 5.2 $\pm$ 1.7           | 78.4 $\pm$ 4.5      |
| Sita 4d protocol | 4.8 $\pm$ 1.3           | 82.6 $\pm$ 3.9      |
| mMoDCs           |                         |                     |
| Control          | 5.9 $\pm$ 1.6           | 72.4 $\pm$ 4.8      |
| Sita 0d protocol | 5.5 $\pm$ 1.9           | 70.2 $\pm$ 5.1      |
| Sita 4d protocol | 6.4 $\pm$ 1.7           | 69.2 $\pm$ 5.0      |

The viability of MoDCs in a 5-day culture period was assessed by staining the cells with Trypan blue. Dead (Trypan blue+ cells) were presented as mean %  $\pm$  SD (n = 3 different cultures). Total viability (% of survival cells in culture relative to the initial number of cells used as 100%) was determined as follows: number of cells in culture – number of dead cells/ number of initial cells  $\times$  100. The differences between sitagliptin-treated MoDCs and corresponding control MoDCs for both parameters were not statistically significant ( $p > 0.05$ ).

**Supplementary Table S3.** The total number of T cells recovered at the end of the co-culture period

| Co-culture     |         | N <sup>o</sup> of T cells (Th polarization protocol)<br>( $\times 10^5$ ) | N <sup>o</sup> of T cells (Tregs protocol)<br>( $\times 10^5$ ) |
|----------------|---------|---------------------------------------------------------------------------|-----------------------------------------------------------------|
| imMoDC/T cells |         |                                                                           |                                                                 |
|                | Control | 1.64 $\pm$ 0.14                                                           | 1.34 $\pm$ 0.22                                                 |
|                | Sita 0d | 1.22 $\pm$ 0.22*                                                          | 1.24 $\pm$ 0.34                                                 |
|                | Sita 4d | 1.46 $\pm$ 0.26                                                           | 1.18 $\pm$ 0.26                                                 |
| mMoDC/T cells  |         |                                                                           |                                                                 |
|                | Control | 2.24 $\pm$ 0.18                                                           | 2.48 $\pm$ 0.33                                                 |
|                | Sita 0d | 1.65 $\pm$ 0.23*                                                          | 2.08 $\pm$ 0.28                                                 |
|                | Sita 4d | 1.77 $\pm$ 0.24*                                                          | 2.24 $\pm$ 0.25                                                 |

The total number of T cells in MoDC/T-cell co-cultures was calculated manually after 4 days (Th polarization protocol) or 6 days (Tregs protocol). Values are given as mean  $\pm$  SD of triplicates of one representative experiment. \*  $p < 0.05$  compared to corresponding controls.

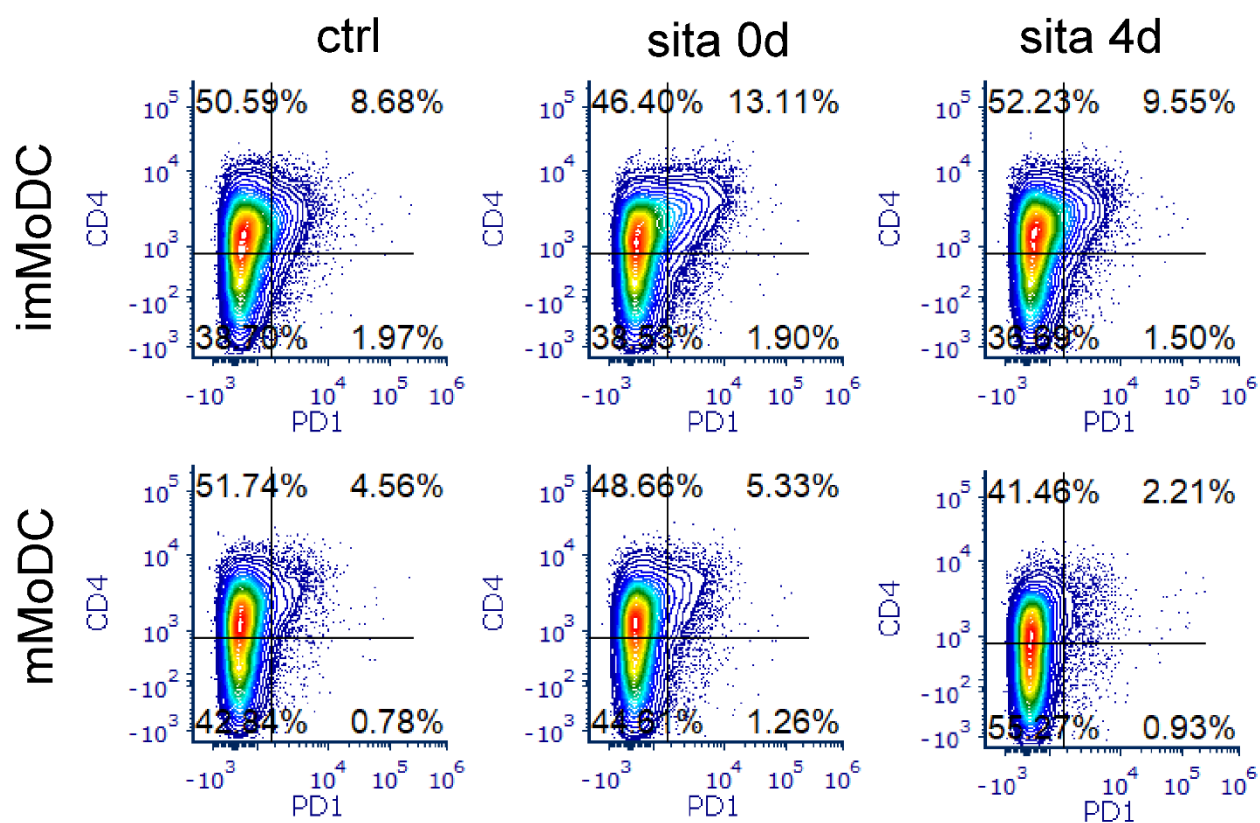

**Supplementary Figure S1.** The effect of MoDCs treated with sitagliptin (500  $\mu\text{g/mL}$ ) on the expression of PD1 on T cells in co-culture. The plots, from one experiment out of three ones with similar results, show the percentages of CD4+PD1+ T cells.

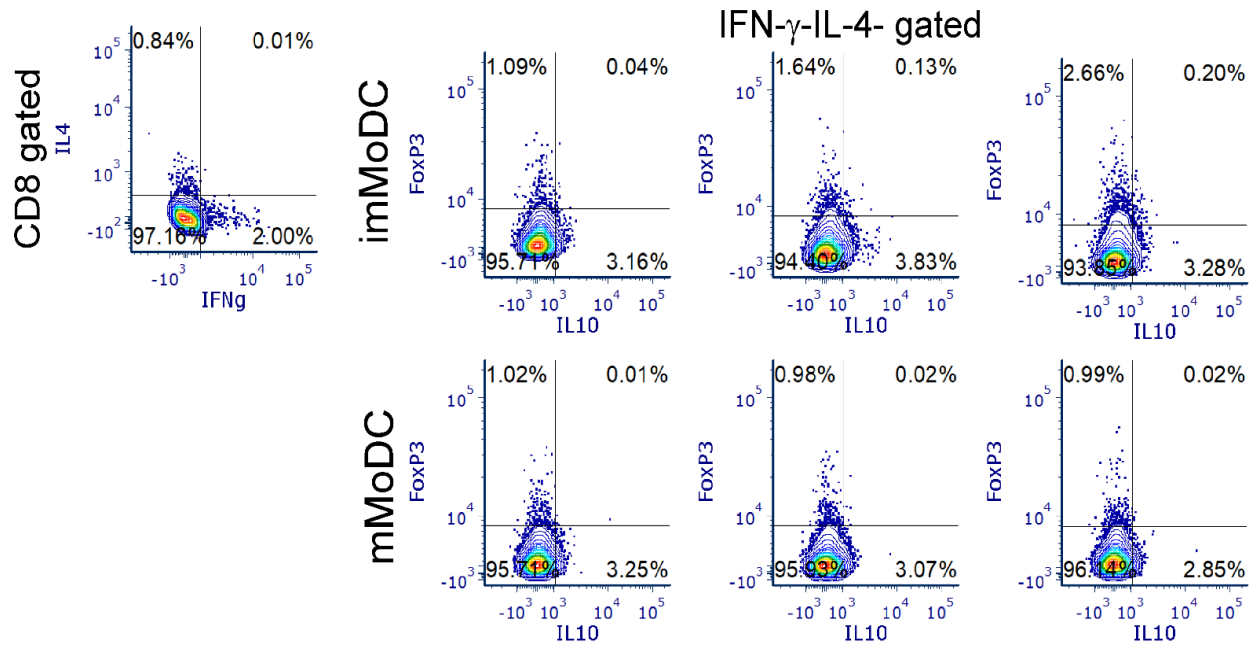

**Supplementary Figure S2.** The effect of MoDCs treated with sitagliptin (500  $\mu\text{g/mL}$ ) on the induction of regulatory cells within the CD8+ T-cell population. The cells were identified as CD8+Foxp3-IL-10+ T cells within the IFN- $\gamma$ -IL-4-CD8+ T-cell population. The results (flow cytometric plots) are from one representative experiment, out of three ones with similar findings.

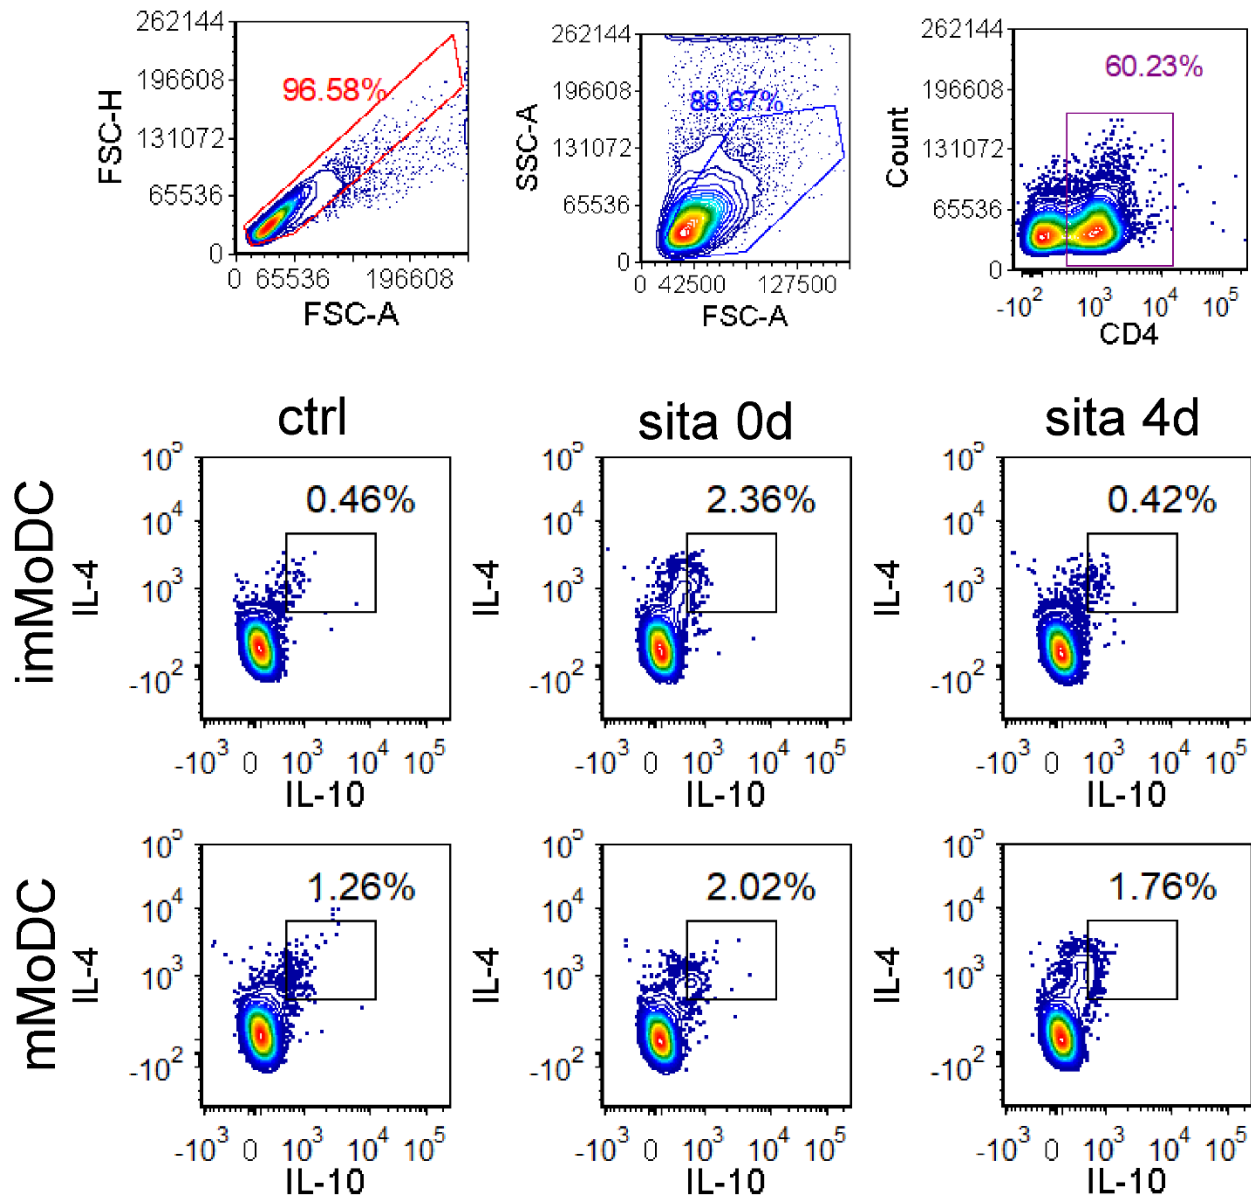

**Supplementary Figure S3.** The effect of MoDCs treated with sitagliptin (500  $\mu\text{g/mL}$ ) on the expression of IL-10 in the Th2 subset. The plots, from one experiment out of three ones with similar results, show the percentages of IL-4+IL-10+ T cells.

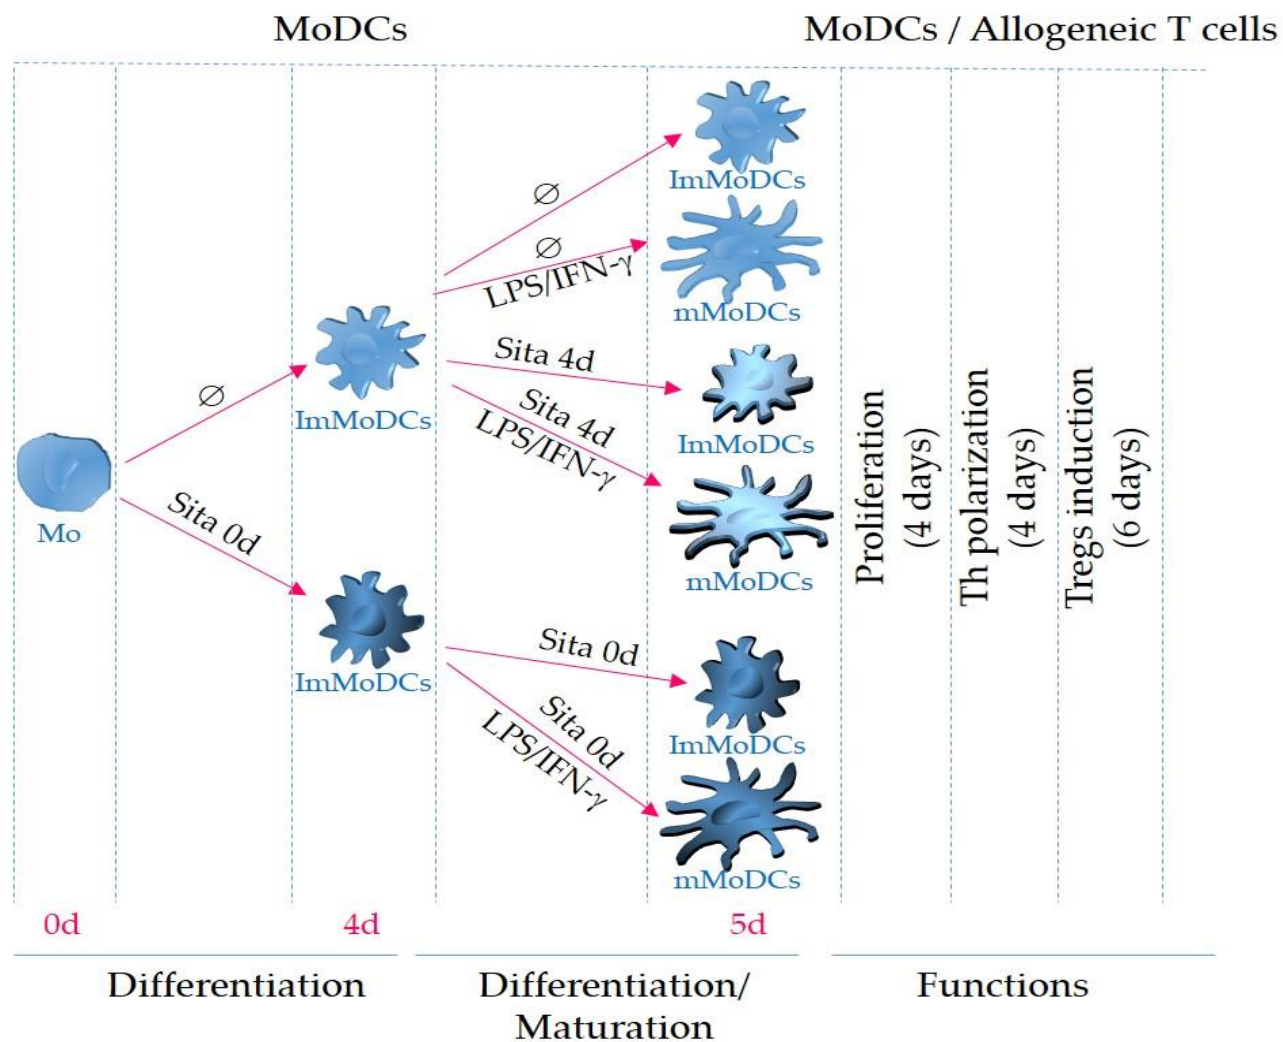

**Supplementary Figure S4.** Schematic presentation of the methodology for the generation of MoDCs and testing their functions.
